# Supplementary material for: Transcriptional regulation by BglJ–RcsB, a pleiotropic heteromeric activator in Escherichia coli
Source: PubMed Central journal article supplement — Nucleic Acids Res. 2013 Dec 13;42(5):2999–3008. doi: 10.1093/nar/gkt1298 (PMC3950696; doi:10.1093/nar/gkt1298), 2013-12-13
Supplement: supp_gkt1298_nar-02114-v-2013-File008.pdf [file supp_gkt1298_nar-02114-v-2013-File008.pdf]

## SUPPLEMENTARY INFORMATION

### Transcriptional regulation by BglJ-RcsB, a pleiotropic heteromeric transcriptional activator in *Escherichia coli*

Silja Lucia Salscheider, Andreas Jahn, and Karin Schnetz

Institute for Genetics, University of Cologne, Zùlpicher Str. 47a, 50674 Cologne, Germany  
phone +49-221-4703815, fax +49-221-4705185, schnetz@uni-koeln.de

The supplementary information includes Tables S1 (*E. coli* K12 strains), S2 (Plasmids), S3 (Oligonucleotides), and supplementary references (52,53).

| <b>Table S1 <i>E. coli</i> K12 strains</b>                                                          |                                                                                                                 |                                                                                |
|-----------------------------------------------------------------------------------------------------|-----------------------------------------------------------------------------------------------------------------|--------------------------------------------------------------------------------|
| <b>Strain</b>                                                                                       | <b>relevant genotype<sup>a</sup></b>                                                                            | <b>Reference / Construction<sup>a</sup></b>                                    |
| BW30270                                                                                             | = MG1655 <i>rph</i> <sup>+</sup><br>Laboratory collection No S3839                                              | Datsenko and Wanner,<br>deposited at the Coli<br>Genetic Stock Center<br>#7925 |
| S1734                                                                                               | <i>bglJ<sub>c</sub></i> (constitutive <i>bglJ</i> expression, allele <i>yjjQ/bglJ-Y6::mTn10-cmR</i> )           | (31)                                                                           |
| BRE2055                                                                                             | BRE2047 $\Delta$ <i>crp96 zhd-732::Tn10</i>                                                                     | (52)                                                                           |
| S541                                                                                                | $\Delta$ <i>bgl</i> $\Delta$ <i>lacZ</i> <i>ara thi</i>                                                         | (26)                                                                           |
| S3010                                                                                               | S541 $\Delta$ <i>hns::kanR<sub>KD4</sub></i>                                                                    | (4)                                                                            |
| S3910                                                                                               | S541 <i>bglJ<sub>c</sub></i> (cmR)                                                                              | S541 x T4GT7 (S1734)                                                           |
| S3974                                                                                               | BW30270 <i>ilvG</i> <sup>+</sup> (not motile)                                                                   | (4)                                                                            |
| S4197                                                                                               | S3974 $\Delta$ <i>lacZ</i>                                                                                      | (4)                                                                            |
| T314                                                                                                | S4197 $\Delta$ <i>leuO<sub>FRT</sub></i> $\Delta$ ( <i>yjjP-yjjQ-bglJ</i> ) <sub>FRT</sub>                      | (20)                                                                           |
| T1032                                                                                               | S4197 $\Delta$ <i>leuO<sub>FRT</sub></i> <i>bglJ<sub>c</sub></i> (cmR)                                          | (20)                                                                           |
| T15                                                                                                 | S4197 $\Delta$ <i>rcsB::kanR<sub>KD4</sub></i>                                                                  | (4)                                                                            |
| T23                                                                                                 | S4197 $\Delta$ ( <i>yjjP-yjjQ-bglJ</i> ) <sub>FRT</sub>                                                         | (20)                                                                           |
| T75                                                                                                 | S3974 $\Delta$ ( <i>yjjP-yjjQ-bglJ</i> ) <sub>FRT</sub>                                                         | (20)                                                                           |
| T1030                                                                                               | S4197 <i>bglJ<sub>c</sub></i> (cmR, Bgl <sup>+</sup> )                                                          | S4197 x T4GT7 (S1734)                                                          |
| T1048                                                                                               | S3974 $\Delta$ ( <i>yjjP-yjjQ-bglJ</i> ) <sub>FRT</sub> $\Delta$ <i>hns<sub>FRT</sub> stpA::Tet<sup>R</sup></i> | (20)                                                                           |
| T1166                                                                                               | S3974 <i>bglJ<sub>c</sub></i> (cmR, Bgl <sup>+</sup> )                                                          | x T4GT7 (S1734)                                                                |
| <b>Strains with insertions of promoter <i>lacZ</i> fusions at <i>attB</i> (derivatives of T314)</b> |                                                                                                                 |                                                                                |
| T1188                                                                                               | <i>attB::[PchiA lacZ spec<sup>R</sup>]</i>                                                                      | T314/pLDR8 x pKESL9                                                            |
| T1478                                                                                               | <i>attB::[PchiA lacZ spec<sup>R</sup>] bglJ<sub>c</sub></i> (cmR)                                               | T1188 x T4GT7 (S1734)                                                          |
| T1772                                                                                               | <i>attB::[PchiA lacZ spec<sup>R</sup>] bglJ<sub>c</sub></i> (cmR) $\Delta$ <i>rcsB::kanR<sub>KD4</sub></i>      | T1478 x T4GT7 (T15)                                                            |
| T1191                                                                                               | <i>attB::[PmolR lacZ spec<sup>R</sup>]</i>                                                                      | T314/pLDR8 x pKESL3                                                            |
| T1441                                                                                               | <i>attB::[PmolR lacZ spec<sup>R</sup>] bglJ<sub>c</sub></i> (cmR)                                               | T1191 x T4GT7 (S1734)                                                          |
| T1773                                                                                               | <i>attB::[PmolR lacZ spec<sup>R</sup>] bglJ<sub>c</sub></i> (cmR) $\Delta$ <i>rcsB::kanR<sub>KD4</sub></i>      | T1441 x T4GT7 (T15)                                                            |
| T1226                                                                                               | <i>attB::[PmolR<sub>mut</sub> lacZ spec<sup>R</sup>]</i>                                                        | T314/pLDR8 x pKESL13                                                           |
| T1444                                                                                               | <i>attB::[PmolR<sub>mut</sub> lacZ spec<sup>R</sup>] bglJ<sub>c</sub></i> (cmR)                                 | T1226 x T4GT7 (S1734)                                                          |
| T1181                                                                                               | <i>attB::[PsfsB lacZ spec<sup>R</sup>]</i>                                                                      | T314/pLDR8 x pKESL5                                                            |
| T1436                                                                                               | <i>attB::[PsfsB lacZ spec<sup>R</sup>] bglJ<sub>c</sub></i> (cmR)                                               | T1181 x T4GT7 (S1734)                                                          |
| T1774                                                                                               | <i>attB::[PsfsB lacZ spec<sup>R</sup>] bglJ<sub>c</sub></i> (cmR) $\Delta$ <i>rcsB::kanR<sub>KD4</sub></i>      | T1436 x T4GT7 (T15)                                                            |
| T1228                                                                                               | <i>attB::[PsfsB<sub>mut</sub> lacZ spec<sup>R</sup>]</i>                                                        | T314/pLDR8 x pKESL15                                                           |
| T1446                                                                                               | <i>attB::[PsfsB<sub>mut</sub> lacZ spec<sup>R</sup>] bglJ<sub>c</sub></i> (cmR)                                 | T1228 x T4GT7 (S1734)                                                          |
| T1186                                                                                               | <i>attB::[PyecT lacZ spec<sup>R</sup>]</i>                                                                      | T314/pLDR8 x pKESL8                                                            |
| T1476                                                                                               | <i>attB::[PyecT lacZ spec<sup>R</sup>] bglJ<sub>c</sub></i> (cmR)                                               | T1186 x T4GT7 (S1734)                                                          |
| T1775                                                                                               | <i>attB::[PyecT lacZ spec<sup>R</sup>] bglJ<sub>c</sub></i> (cmR) $\Delta$ <i>rcsB::kanR<sub>KD4</sub></i>      | T1476 x T4GT7 (T15)                                                            |
| T1189                                                                                               | <i>attB::[PygiZ lacZ spec<sup>R</sup>]</i>                                                                      | T314/pLDR8 x pKESL10                                                           |
| T1438                                                                                               | <i>attB::[PygiZ lacZ spec<sup>R</sup>] bglJ<sub>c</sub></i> (cmR)                                               | T1189 x T4GT7 (S1734)                                                          |
| T1776                                                                                               | <i>attB::[PygiZ lacZ spec<sup>R</sup>] bglJ<sub>c</sub></i> (cmR) $\Delta$ <i>rcsB::kanR<sub>KD4</sub></i>      | T1438 x T4GT7 (T15)                                                            |
| T1236                                                                                               | <i>attB::[PygiZ<sub>mut</sub> lacZ spec<sup>R</sup>]</i>                                                        | T314/pLDR8 x pKESL20                                                           |
| T1450                                                                                               | <i>attB::[PygiZ<sub>mut</sub> lacZ spec<sup>R</sup>] bglJ<sub>c</sub></i> (cmR)                                 | T1236 x T4GT7 (S1734)                                                          |

| <b>Table S1 E. coli K12 strains</b> |                                                                                                                       |                                             |
|-------------------------------------|-----------------------------------------------------------------------------------------------------------------------|---------------------------------------------|
| <b>Strain</b>                       | <b>relevant genotype<sup>a</sup></b>                                                                                  | <b>Reference / Construction<sup>a</sup></b> |
| T1184                               | attB::[ <i>PyidL lacZ spec<sup>R</sup></i> ]                                                                          | T314/pLDR8 x pKESL7                         |
| T1474                               | attB::[ <i>PyidL lacZ spec<sup>R</sup></i> ] <i>bglJ<sub>c</sub></i> (cmR)                                            | T1184 x T4GT7 (S1734)                       |
| T1777                               | attB::[ <i>PyidL lacZ spec<sup>R</sup></i> ] <i>bglJ<sub>c</sub></i> (cmR) $\Delta$ <i>rcsB</i> ::kanR <sub>KD4</sub> | T1474 x T4GT7 (T15)                         |
| T1579                               | attB::[ <i>PyidL<sub>mut</sub> lacZ spec<sup>R</sup></i> ]                                                            | T314/pLDR8 x pKESL92                        |
| T1581                               | attB::[ <i>PyidL<sub>mut</sub> lacZ spec<sup>R</sup></i> ] <i>bglJ<sub>c</sub></i> (cmR)                              | T314/pLDR8 x pKESL92                        |
| T1177                               | attB::[ <i>PykiA lacZ spec<sup>R</sup></i> ]                                                                          | T314/pLDR8 x pKESL1                         |
| T1472                               | attB::[ <i>PykiA lacZ spec<sup>R</sup></i> ] <i>bglJ<sub>c</sub></i> (cmR)                                            | T1177 x T4GT7 (S1734)                       |
| T1778                               | attB::[ <i>PykiA lacZ spec<sup>R</sup></i> ] <i>bglJ<sub>c</sub></i> (cmR) $\Delta$ <i>rcsB</i> ::kanR <sub>KD4</sub> | T1472 x T4GT7 (T15)                         |
| T1552                               | attB::[ <i>PykiA<sub>mut</sub> lacZ spec<sup>R</sup></i> ]                                                            | T314/pLDR8 x pKESL41                        |
| T1557                               | attB::[ <i>PykiA<sub>mut</sub> lacZ spec<sup>R</sup></i> ] <i>bglJ<sub>c</sub></i> (cmR)                              | T314/pLDR8 x pKESL41                        |
| T1179                               | attB::[ <i>PynbA lacZ spec<sup>R</sup></i> ]                                                                          | T314/pLDR8 x pKESL2                         |
| T1326                               | attB::[ <i>PynbA lacZ spec<sup>R</sup></i> ] <i>bglJ<sub>c</sub></i> (cmR)                                            | T1179 x T4GT7 (S1734)                       |
| T1779                               | attB::[ <i>PynbA lacZ spec<sup>R</sup></i> ] <i>bglJ<sub>c</sub></i> (cmR) $\Delta$ <i>rcsB</i> ::kanR <sub>KD4</sub> | T1326 x T4GT7 (T15)                         |
| T1224                               | attB::[ <i>PynbA<sub>mut</sub> lacZ spec<sup>R</sup></i> ]                                                            | T314/pLDR8 x pKESL12                        |
| T1442                               | attB::[ <i>PynbA<sub>mut</sub> lacZ spec<sup>R</sup></i> ] <i>bglJ<sub>c</sub></i> (cmR)                              | T1224x T4GT7 (S1734)                        |
| T1183                               | attB::[ <i>PynjI lacZ spec<sup>R</sup></i> ]                                                                          | T314/pLDR8 x pKESL6                         |
| T1327                               | attB::[ <i>PynjI lacZ spec<sup>R</sup></i> ] <i>bglJ<sub>c</sub></i> (cmR)                                            | T1183 x T4GT7 (S1734)                       |
| T1780                               | attB::[ <i>PynjI lacZ spec<sup>R</sup></i> ] <i>bglJ<sub>c</sub></i> (cmR) $\Delta$ <i>rcsB</i> ::kanR <sub>KD4</sub> | T1327 x T4GT7 (T15)                         |
| T1230                               | attB::[ <i>PynjI<sub>mut</sub> lacZ spec<sup>R</sup></i> ]                                                            | T314/pLDR8 x pKESL16                        |
| T1448                               | attB::[ <i>PynjI<sub>mut</sub> lacZ spec<sup>R</sup></i> ] <i>bglJ<sub>c</sub></i> (cmR)                              | T1230 x T4GT7 (S1734)                       |
| T1180                               | attB::[ <i>PyqhG lacZ spec<sup>R</sup></i> ]                                                                          | T314/pLDR8 x pKESL4                         |
| T1473                               | attB::[ <i>PyqhG lacZ spec<sup>R</sup></i> ] <i>bglJ<sub>c</sub></i> (cmR)                                            | T1180 x T4GT7 (S1734)                       |
| T1781                               | attB::[ <i>PyqhG lacZ spec<sup>R</sup></i> ] <i>bglJ<sub>c</sub></i> (cmR) $\Delta$ <i>rcsB</i> ::kanR <sub>KD4</sub> | T1473 x T4GT7 (T15)                         |
| T568                                | attB::[ <i>Pbgl t1<sub>RAT</sub> bglG lacZ spec<sup>R</sup></i> ]                                                     | (4)                                         |
| T1432                               | T568 <i>bglJ<sub>c</sub></i> (cmR)                                                                                    | T568 x T4GT7 (S1734)                        |
| T1500                               | T568 $\Delta$ <i>crp96 zhd-732</i> ::Tn10                                                                             | T568 x T4GT7 (BRE2055)                      |
| T1502                               | T568 $\Delta$ <i>crp96-zhd-732</i> ::Tn10 <i>bglJ<sub>c</sub></i> (cmR)                                               | T1432 x T4GT7 (BRE2055)                     |
| T729                                | T568 <i>hns<sub>FRT</sub></i>                                                                                         | (4)                                         |
| T580                                | attB::[ <i>Pbgl_BglJ-RcsB<sub>mut1</sub> t1<sub>RAT</sub> bglG lacZ spec<sup>R</sup></i> ]                            | (4)                                         |
| T1434                               | T580 <i>bglJ<sub>c</sub></i> (cmR)                                                                                    | T580 x T4GT7 (S1734)                        |
| T1501                               | T580 $\Delta$ <i>crp96 zhd-732</i> ::Tn10                                                                             | T580 x T4GT7 (BRE2055)                      |
| T1503                               | T580 <i>bglJ<sub>c</sub></i> (cmR) $\Delta$ <i>crp96 zhd-732</i> ::Tn10                                               | T1434 x T4GT7 (BRE2055)                     |
| T735                                | T580 <i>hns<sub>FRT</sub></i>                                                                                         | (4)                                         |
| T1413                               | attB::[ <i>Pbgl_CRP<sub>mut</sub> t1<sub>RAT</sub> bglG lacZ spec<sup>R</sup></i> ]                                   | T314/pLDR8 x pKESL46                        |
| T1507                               | T1413 <i>bglJ<sub>c</sub></i> (cmR)                                                                                   | T1413 x T4GT7 (S1734)                       |
| T1504                               | T1413 $\Delta$ <i>crp96 zhd-732</i> ::Tn10                                                                            | T1413 x T4GT7 (BRE2055)                     |
| T1550                               | T1413 <i>bglJ<sub>c</sub></i> (cmR) $\Delta$ <i>crp96 zhd-732</i> ::Tn10                                              | T1507 x T4GT7 (BRE2055)                     |
| T1543                               | T1413 $\Delta$ <i>hns</i> ::kan <sub>KD4</sub>                                                                        | T1413 x T4GT7 (S3010)                       |
| T1465                               | attB::[ <i>Pbgl_BglJ-RcsB<sub>mut1</sub> CRP<sub>mut</sub> t1<sub>RAT</sub> bglG lacZ spec<sup>R</sup></i> ]          | T314/pLDR8 x pKESL47                        |
| T1493                               | T1465 <i>bglJ<sub>c</sub></i> (cmR)                                                                                   | T1465 x T4GT7 (S1734)                       |
| T1506                               | T1465 $\Delta$ <i>crp96 zhd-732</i> ::Tn10                                                                            | T1465 x T4GT7 (BRE2055)                     |
| T1530                               | T1465 <i>bglJ<sub>c</sub></i> (cmR) $\Delta$ <i>crp96 zhd-732</i> ::Tn10                                              | T1493 x T4GT7 (BRE2055)                     |
| T1545                               | T1465 $\Delta$ <i>hns</i> ::kan <sub>KD4</sub>                                                                        | T1465 x T4GT7 (S3010)                       |

<sup>a</sup> Strain construction was performed as described previously (15,26). Bacteriophage T4GT7 (28) was used for transduction with the donor strains given in brackets. Transductants of the *bglJ<sub>c</sub>* (cmR) allele were selected on LB chloramphenicol plates and analyzed by PCR. Co-transduction of  $\Delta$ *crp96* with *zhd-732*::Tn10 was screened on MacConkey Maltose plates, and Maltose negative colonies were taken. Integration of reporter constructs into the phage  $\lambda$  *attB* site was performed using origin-less re-ligated BamHI fragments of the plasmids, which carry a promoter *lacZ* fusion, the *attP*-site for integration, and the *aadA* gene for selection on LB spectinomycin plates. These origin-less circular DNA molecules were used to transform strain T314 carrying the *int* expressing helper-plasmid pLDR8 (25,26).

| <b>Table S2</b>           | <b>Plasmids</b>                                                                                                          |                                                             |
|---------------------------|--------------------------------------------------------------------------------------------------------------------------|-------------------------------------------------------------|
| <b>Plasmid</b>            | <b>Features<sup>a, b</sup></b>                                                                                           | <b>Reference / Construction<sup>c, d, e</sup></b>           |
| pDCRP                     | <i>crp</i> in pBR-ori ampR                                                                                               | (35)                                                        |
| pDCRP-H159L               | <i>crp</i> -H159L (CAC->CTG) in pBR-ori ampR                                                                             | (35)                                                        |
| pDCRP-H19L<br>(=pKES324)  | <i>crp</i> -H19L (CAC->CTC) in pBR-ori ampR                                                                              | this work <sup>c</sup>                                      |
| pDCRP-K101E<br>(=pKES328) | <i>crp</i> -K101E (AAA->GAA) in pBR-ori ampR                                                                             | this work <sup>c</sup>                                      |
| pDctrl<br>(=pKES325)      | vector control for pDCRP (= pBR-ori ampR), sequence at BamHI, Sall fusion is GAATTC <sup>3</sup> CGGGGATCcgaccgatgccttga | pDCRP BamHI, Sall, re-ligated                               |
| pFMAC20                   | <i>E-PbgI t1 bglG lacZ</i> p15A-ori kanR attP specR                                                                      | (53)                                                        |
| pFMAC19                   | pFMAC20 with CAATTG insertion at -61,5 relative to <i>P2bgl</i>                                                          | (53)                                                        |
| pKES209                   | pFMAC20 with CAATTG insertion at -69,5 relative to <i>P2bgl</i>                                                          | this work <sup>d</sup>                                      |
| pKES203                   | pFMAC20 with CAATTG insertion at -80,5 relative to <i>P2bgl</i>                                                          | this work <sup>d</sup>                                      |
| pKES205                   | pFMAC20 with CAATTG insertion at -84,5 relative to <i>P2bgl</i>                                                          | this work <sup>d</sup>                                      |
| pKES207                   | pFMAC20 with CAATTG insertion at -88,5 relative to <i>P2bgl</i>                                                          | this work <sup>d</sup>                                      |
| pLDR8                     | <i>cl<sub>357</sub> P<sub>R</sub> λ-int</i> in pSC101 rep <sup>ts</sup> kanR                                             | (25)                                                        |
| pKES268                   | <i>PlacUV5</i> MCS <i>lacZ</i> p15A-ori kanR attP specR                                                                  | this work <sup>e</sup>                                      |
| pKESL9                    | <i>PchiA</i> (pos:3468190-3467882) <i>lacZ</i>                                                                           | cloned PCR fragment T672, T673                              |
| pKESL3                    | <i>PmolR(yehH)</i> (pos:2194338-2194505) <i>lacZ</i>                                                                     | cloned PCR fragment T658, T659                              |
| pKESL13                   | <i>PmolR<sub>mut</sub></i> (TTCTTT <b>ga</b> AAAT <b>ag</b> CTAAAG) <i>lacZ</i>                                          | T699 for mutagenesis                                        |
| pKES329                   | <i>PmolR</i> 5bp insertion <i>lacZ</i>                                                                                   | this work <sup>f</sup>                                      |
| pKES330                   | <i>PmolR</i> 10bp insertion <i>lacZ</i>                                                                                  | this work <sup>f</sup>                                      |
| pKESL5                    | <i>PsfsB</i> (pos:3332698-3352942) <i>lacZ</i>                                                                           | cloned PCR fragment T662, T663                              |
| pKESL15                   | <i>PsfsB<sub>mut</sub></i> (ATCTTT <b>ga</b> ATAT <b>ag</b> TGAATA) <i>lacZ</i>                                          | T701 for mutagenesis                                        |
| pKESL8                    | <i>PyecT</i> (pos:1959790-1960001) <i>lacZ</i>                                                                           | cloned PCR fragment T676, T677                              |
| pKESL4                    | <i>PyqhG</i> (pos:3155455-3155686) <i>lacZ</i>                                                                           | cloned PCR fragment T660, T661                              |
| pKESL10                   | <i>PygiZ</i> (pos:3170219-3170566) <i>lacZ</i>                                                                           | cloned PCR fragment T674, T675                              |
| pKESL20                   | <i>PygiZ<sub>mut</sub></i> (GGATA <b>ga</b> ATTT <b>ag</b> TGAAAA) <i>lacZ</i>                                           | T705 for mutagenesis                                        |
| pKESL7                    | <i>PyidL</i> (pos:3858054-3878320) <i>lacZ</i>                                                                           | cloned PCR fragment T668, T669                              |
| pKESL92                   | <i>PyidL<sub>mut</sub></i> (GCAGTCAGAT <b>ag</b> TTAAAATA) <i>lacZ</i>                                                   | T816 for mutagenesis                                        |
| pKES331                   | <i>PyidL</i> 5bp insertion <i>lacZ</i>                                                                                   | this work <sup>f</sup>                                      |
| pKES332                   | <i>PyidL</i> 10bp insertion <i>lacZ</i>                                                                                  | this work <sup>f</sup>                                      |
| pKESL1                    | <i>PykiA</i> (pos:0407683-0407892) <i>lacZ</i>                                                                           | cloned PCR fragment T654, T655                              |
| pKESL41                   | <i>PykiA<sub>mut</sub></i> (GGAGGGCATT <b>TTg</b> TGAAAT) <i>lacZ</i>                                                    | T765 and T812 for mutagenesis                               |
| pKESL2                    | <i>PynbA</i> (pos:1475436-1475662) <i>lacZ</i>                                                                           | cloned PCR fragment T656, T657                              |
| pKESL12                   | <i>PynbA<sub>mut1</sub></i> (ACCTT <b>Gga</b> ATAT <b>ag</b> TGAATT) <i>lacZ</i>                                         | T698 for mutagenesis                                        |
| pKESL6                    | <i>PynjI</i> (pos:1843066-1842886) <i>lacZ</i>                                                                           | cloned PCR fragment T664, T665                              |
| pKESL16                   | <i>PynjI<sub>mut1</sub></i> (TTCGAG <b>ga</b> ATAT <b>ag</b> TGAAAT) <i>lacZ</i>                                         | T702 for mutagenesis                                        |
| pKENV61                   | <i>Pbgl t1<sub>RAT</sub> bglG lacZ</i>                                                                                   | (50)                                                        |
| pKES222                   | <i>Pbgl_BglI-RcsB<sub>mut1</sub></i> (AACTTTATAAAT <b>ag</b> CTAAAAT) t1 <sub>RAT</sub> <i>bglG lacZ</i>                 | (4)                                                         |
| pKESL46                   | <i>Pbgl_CRP<sub>mut</sub></i> (AACacCGACGATCCTCATT <b>TT</b> ) t1 <sub>RAT</sub> <i>bglG lacZ</i>                        | primer T770 for mutagenesis amplified from template pKENV61 |
| pKESL47                   | <i>Pbgl_BglI-RcsB<sub>mut1</sub>_CRP<sub>mut</sub></i> t1 <sub>RAT</sub> <i>bglG lacZ</i>                                | primer T770 for mutagenesis amplified from template pKES222 |

<sup>a</sup> Unless otherwise stated the vector backbone of the plasmids carry a p15A derived origin of replication, the *neo* gene conferring kanamycin resistance (kanR), the *aadA* gene conferring spectinomycin resistance (specR), and the phage  $\lambda$  attP site, as described (26).

<sup>b</sup> Positions in brackets refer to the reference genome sequence NC\_000913 of *E. coli* K12 strain MG1655. Sequences in bracket refer to presumptive BglI-RcsB binding sites with site-specific mutations shown in lower case bold letters.

<sup>c</sup> Plasmids expressing *crp* mutants were constructed by cloning overlapping PCR fragments into the Sall, BamHI digested pDcrp plasmid DNA. The PCR fragments were generated using oligonucleotides T870 and T871 for mutagenesis of residue 19, oligonucleotides T940 and T941 for mutagenesis of residue 101, oligonucleotides T24 and S527 for amplification, and pDCRP as template.

<sup>d</sup> Plasmids carrying 6bp CAATTG insertions within the *bgl* regulatory region were generated by MunI digestion of plasmids carrying insertions of *lacO* (53). *E-Pbgl* carries a 1 bp exchange from A to G at position -79/-99 relative to the transcription start sites of *P2bgl* and *Pbgl* generating an EcoRI-site (53).

<sup>e</sup> Plasmid pKES268 was used as cloning vector, pKES268 carries a *lacUV5* promoter fragment flanked by a Sall restriction site (upstream) and a multiple cloning site (MCS) including a XbaI site (downstream). The Sall and XbaI sites were used for cloning of promoter fragments amplified by PCR using cells of strain BW30270 as template.

<sup>f</sup> The derivatives of *PmoIR* and *PyidL lacZ* fusions with 5bp and 10 bp duplications in between the BglI-RcsB binding site and the promoter were constructed by overlapping PCR using oligonucleotides T932 and T933 (*PmoIR* +5bp), T934 and T935 (*PmoIR* +10bp), T936 and T937 (*PyidL* +5bp), and T938 and T939 (*PyidL* +10bp).

**Table S3 Oligonucleotides**

| No   | Sequence <sup>a</sup>                                  | Purpose                                     |
|------|--------------------------------------------------------|---------------------------------------------|
| S527 | AAGAATTCGCCGGCTTCCATTCAGGT                             | <i>crp</i> cloning, maps in vector backbone |
| T24  | GAAAAGTGCCACCTGACGTCTAA                                | <i>crp</i> cloning, maps in vector backbone |
| T265 | GCGCGAATTCCTGTAGAACGA                                  | 5'RACE EcoRI                                |
| T268 | AUAUGCGCGAAUUCUGUAGAACGAACACUAGAAGAAA                  | 5'RACE RNA adapter                          |
| T654 | gtcagtcgacTAATTCCTCGCCTTCCCCTTG                        | PykiA cloning                               |
| T655 | gtcatctagaTGACGCCACCATTTCATCAT                         | PykiA cloning                               |
| T656 | gtcagtcgacCGGGAACAAGCGATGAGAAAA                        | PynbA cloning                               |
| T657 | gtcatctagaTATCTGGTAGAGCGTCATTATCAATCCT                 | PynbA cloning                               |
| T658 | gtcagtcgacGGTCATCAGGTGAAATAATCCCC                      | PmoIR cloning                               |
| T659 | gtcatctagaAGTGTCTCATTCTGCATCCCTGTAATT                  | PmoIR cloning                               |
| T660 | gtcagtcgacGACCAGTTCGGCGGCTAACAT                        | PyqhG cloning                               |
| T661 | gtcatctagaAAGTATTATTTTCATCTGTTTTTCACCTCTCC             | PyqhG cloning                               |
| T662 | gtcagtcgacCGTTAATCCCCTCCCCTCATC                        | PsfSb cloning                               |
| T663 | gtcatctagaATTACTTTCCATTTTTCCTCACTCCTTA                 | PsfSb cloning                               |
| T664 | gtcagtcgacAAAGTCCGCCAGCAGATGAAGTC                      | PynjI cloning                               |
| T665 | gtcatctagaCTTTTTTCATCACATCCCTGTTATTACATACT             | PynjI cloning                               |
| T666 | gtcagtcgacCGGGTGGGGGATAATTCA                           | PyiaBA cloning                              |
| T667 | gtcatctagaCTTTGAGGTTTTTCATAACGATCTCCATAT               | PyiaBA cloning                              |
| T668 | gtcagtcgacGTATCTGTTTTGCGGACCTTCCAC                     | PyidL cloning                               |
| T669 | gtcatctagaCAATTTTCCATTCATTTTAATATCCCTCC                | PyidL cloning                               |
| T670 | gtcagtcgacGACTTTCGCCTTTATTTGGGTGG                      | PyigGF cloning                              |
| T671 | gtcatctagaTCTGGAAATCTTACCGTTAGATGTTGG                  | PyigGF cloning                              |
| T672 | gtcagtcgacGTTGTTGCTAAAGTTCTGGGCTAATT                   | PchiA cloning                               |
| T673 | gtcatctagaCCCTTGTGACGTAAAACTGCAAA                      | PchiA cloning                               |
| T674 | gtcagtcgacCAGGATGTTGCTATTTTTTAACCTC                    | PygiZ cloning                               |
| T675 | gtcatctagaTTTCTGCTTAAACATATATCAGTACGCTCAT              | PygiZ cloning                               |
| T676 | gtcagtcgacCTGGGTATTGAGACTGTAGAGCGTATGTAA               | PyecT cloning                               |
| T677 | gtcatctagaAAACTGCGGTATTCCTTAAATTCA                     | PyecT cloning                               |
| T698 | 5'phos TGAGTCCCCAATACCTTGgaATATagTGAATTTTAAATGAAACGG   | PynbA mutagenesis                           |
| T699 | 5'phos GACAGCGCCTTTTCTTTagaAAATagCTAAAGTTGTTTTCTTGC    | PmoIR mutagenesis                           |
| T701 | 5'phos AATAGGGATGTGCATCTTTgaATATagTGAATATCCACTCTTTACAG | PsfSb mutagenesis                           |
| T702 | 5'phos TCTTTCGTGCTATTCGAGgaATATagTGAATATCCAGCGGA       | PynjI mutagenesis                           |
| T705 | 5'phos TCACCGATGCAGGATAAgaATTTagTGAAATGACAATACTGATAG   | PygiZ mutagenesis                           |
| T707 | gtcatctagaCGCCAACATCAACAGCAATC                         | <i>ynbA</i> 5'-RACE                         |
| T708 | gtcatctagaCCGAACAATAAGCCCCATCATAAT                     | <i>ynjI</i> 5'-RACE                         |
| T709 | gtcatctagaATTGTATTCTTGTGCGAGGCATGA                     | <i>yecT</i> 5'-RACE                         |
| T710 | gtcatctagaCTTCTTACCTTCTCCGCAATCAG                      | <i>molR</i> 5'-RACE                         |
| T711 | gtcatctagaCTGCGTGGTCTTTTCTTTATCATCTTT                  | <i>yqhG</i> 5'-RACE                         |
| T712 | gtcatctagaAAGCCACCAACCACAAACCAG                        | <i>ygiZ</i> 5'-RACE                         |
| T713 | gtcatctagaGGCTTTCGCAATAATCATCTCTCC                     | <i>sfsB</i> 5'-RACE                         |

**Table S3 Oligonucleotides**

| No   | Sequence <sup>a</sup>                                                        | Purpose                    |
|------|------------------------------------------------------------------------------|----------------------------|
| T714 | gtcatctagaAATAGCCAGCGACCGATCCTG                                              | <i>ykiA</i> 5'-RACE        |
| T715 | gtcatctagaTGTAGAAGAAACCCACCAGGCATT                                           | <i>chiA</i> 5'-RACE        |
| T716 | gtcatctagaTGAGTTGGCGATAAGCGTTT                                               | <i>yidL</i> 5'-RACE        |
| T765 | 5'phos AACGGGAGGGCATT <b>TTT</b> agTGAAATATCCTTTCTTTAGCCATAA                 | <i>ykiA</i> mutagenesis    |
| T770 | 5'phos CTATTGATAAAAATATGACCATGCTCG <b>g</b> GTTATTAAC <b>TTT</b> GTGTAATTTAG | <i>bgl</i> CRP mutagenesis |
| T812 | 5'phos TTATGGGCTAAAGAAAGGATATTTCA <b>ct</b> AAAATGCCCTCCCGTT                 | <i>ykiA</i> mutagenesis    |
| T816 | 5'phos TCGGGTCAGGCAGTCAGAT <b>ag</b> TAAAATACAAACGTCGTATCC                   | <i>yidL</i> mutagenesis    |
| T820 | GTTGTCGCTGTAATGTTTGTGTTCCG                                                   | <i>ynjI</i> , qRT-PCR      |
| T821 | CCGAACAATAAGCCCCATCATAA                                                      | <i>ynjI</i> , qRT-PCR      |
| T822 | CATTATCTCTTGCCAGGCTTACGC                                                     | <i>yecT</i> , qRT-PCR      |
| T823 | GAGATTGTATTCTTGTCTCGCAGGCA                                                   | <i>yecT</i> , qRT-PCR      |
| T828 | TGGCATCGCTCAGGACATTCATC                                                      | <i>chiA</i> , qRT-PCR      |
| T829 | CAGGATAAATGGAAGTCAGAAGGCCAAAG                                                | <i>chiA</i> , qRT-PCR      |
| T832 | CGGTAACGGGCTCTCTCAAGGTAG                                                     | <i>molR</i> , qRT-PCR      |
| T833 | CCAGCCACGGTAAAACAGCATC                                                       | <i>molR</i> , qRT-PCR      |
| T838 | CATACCTACGCCGACGAGCATTAC                                                     | <i>yidL</i> , qRT-PCR      |
| T839 | GCAGTGTATTTGTTGCGCATTCTTTA                                                   | <i>yidL</i> , qRT-PCR      |
| T870 | GGTACTTATGAAT <b>Ga</b> GGCAATGAGACAAGAACCATT                                | <i>crp</i> -H19L           |
| T871 | CTTGCTCATTGC <b>ct</b> CATTATAAGTACCCATCCAAGA                                | <i>crp</i> -H19L           |
| T932 | AAAGTTGTT <b>ttctt</b> TTCTTGCGATTTTGTCTCTCTA                                | <i>PmoIR</i> +5bp cloning  |
| T933 | AATCG <b>Caagaa</b> AAGAAAACA <b>ACTTT</b> AGGAATTTATAAAGAAAAGGC             | <i>PmoIR</i> +5bp cloning  |
| T934 | AAGTTGTT <b>ttcttgcgat</b> TTCTTGCGATTTTGTCTCTCTA                            | <i>PmoIR</i> +10bp cloning |
| T935 | CAAGAA <b>atcgcaagaa</b> AACA <b>ACTTT</b> AGGAATTTATAAAGAAAAGGC             | <i>PmoIR</i> +10bp cloning |
| T936 | CTTAAAATA <b>caaac</b> CAAACGTCGTATCCCTGAACGGATT                             | <i>PyidL</i> +5bp cloning  |
| T937 | GGATACGAC <b>gtttg</b> GTTTGTATTTAAGAATCTGACTGCCT                            | <i>PyidL</i> +5bp cloning  |
| T938 | ACAAAC <b>gtcgacaac</b> GTCGTATCCCTGAACGGATT                                 | <i>PyidL</i> +10bp cloning |
| T939 | CGAC <b>gtttg</b> tcgacGTTTGTATTTAAGAATCTGACTGCCTG                           | <i>PyidL</i> +10bp cloning |
| T940 | ATTTTCGTACAA <b>g</b> AATTTTCGCCAATTGATTGAG                                  | <i>crp</i> -K101E          |
| T941 | TTGGCGAAAT <b>c</b> TTTGTACGAAATTTAGCCAC                                     | <i>crp</i> -K101E          |

<sup>a</sup> Bases of the oligonucleotide which match the template are in capital letters, while other bases are in lower case letters. Mutations are indicated with lower case letters in bold. Restrictions sites are underlined. 5 and 10 bp sequence duplications (oligonucleotides T932-T939) are shown in lowercase and underlined letters.

## SUPPLEMENTARY REFERENCES

- Bremer, E., Gerlach, P. and Middendorf, A. (1988) Double negative and positive control of *tsx* expression in *Escherichia coli*. *J. Bacteriol.*, **170**, 108-116.
- Caramel, A. and Schnetz, K. (1998) Lac and Lambda repressor relieve silencing of the *Escherichia coli* *bgl* promoter. Activation by alteration of a repressing nucleoprotein complex. *J. Mol. Biol.*, **284**, 875-883.
